1 **Female reproductive tract has low concentration of SARS-CoV2 receptors**

2 Jyoti Goad<sup>1,2</sup>, Joshua Rudolph<sup>3</sup>, Aleksandar Rajkovic<sup>1,2\*</sup>

3 <sup>1</sup>Department of Pathology, University of California, San Francisco, USA, <sup>2</sup> Department of OB-  
4 GYN, University of California, San Francisco, USA,<sup>3</sup>Lung Biology Center, Department of  
5 Medicine, University of California, San Francisco, USA

6

7

8

9

10

11

12

13

14

15

16

17

18

19

20

21

22

23

24

25

26

27

28

29

30

31

32

33

34

35

36

37

38 \*Address correspondence to:

39 Dr. Aleksandar Rajkovic

40 HSE-901, 513 Parnassus Ave

41 San Francisco, California

42 USA- 94143

43 Ph: 415-502-4961

44 Email: [aleks.rajkovic@ucsf.edu](mailto:aleks.rajkovic@ucsf.edu)

45

46 **Keywords:** SARS-CoV2, single-cell sequencing, ovary, uterus, myometrium, breast  
47 epithelium, fallopian tube

48 **ABSTRACT**

49

50 There has been significant concern regarding fertility and reproductive outcomes during the  
51 SARS-CoV2 pandemic. Recent data suggests a high concentration of SARS-Cov2 receptors,  
52 *ACE2* or *TMPRSS2*, in nasal epithelium and cornea, which explains person-to-person  
53 transmission. We investigated the prevalence of SARS-CoV2 receptors among reproductive  
54 tissues by exploring the single-cell sequencing datasets from uterus, myometrium, ovary,  
55 fallopian tube, and breast epithelium. We did not detect significant expression of either *ACE2*  
56 or *TMPRSS2* in the normal human myometrium, uterus, ovaries, fallopian tube, or breast.  
57 Furthermore, none of the cell types in the female reproductive organs we investigated, showed  
58 the co-expression of *ACE2* with proteases, *TMPRSS2*, Cathepsin B (*CTSB*), and Cathepsin  
59 L (*CTSL*) known to facilitate the entry of SARS2-CoV2 into the host cell. These results suggest  
60 that myometrium, uterus, ovaries, fallopian tube, and breast are unlikely to be susceptible to  
61 infection by SARS-CoV2. Our findings suggest that COVID-19 is unlikely to contribute to  
62 pregnancy-related adverse outcomes such as preterm birth, transmission of COVID-19  
63 through breast milk, oogenesis and female fertility.

64

65 **INTRODUCTION**

66 The coronavirus disease 2019, also commonly known as COVID-19 is caused by severe acute  
67 respiratory syndrome coronavirus 2 (SARS-CoV2). SARS-CoV2 is a single-stranded positive  
68 sense RNA virus first detected in Wuhan, China in late 2019 (1, 2). Since then, it has spread  
69 worldwide, becoming a global pandemic, infecting nearly 3.58 million people worldwide and  
70 resulting in 247,503 deaths (3). The severity of SARS-CoV2 varies as infected individuals can  
71 be either asymptomatic or present mild to severe symptoms. Some of the most common  
72 symptoms presented among the individuals infected with SARS-CoV2 include fever, cough,  
73 pneumonia, occasional diarrhea, muscle pain, and new loss of sense of smell or taste (4).  
74 SARS-CoV2 binds to angiotensin-converting enzyme 2 (*ACE2*) receptor on the host cells  
75 through spike (S) protein on the surface of the virus (2, 5). In addition to *ACE2*, entry of the

76 virus into the host cell is also mediated by proteases *TMPRSS2* (5). In the absence of  
77 *TMPRSS2*, SARS-CoV2 is known to use cathepsins, *CTSB* and *CTSL* as an alternate to enter  
78 the host cells (5). These proteases are required for the priming of the S protein after it binds  
79 to the *ACE2* receptor for its entry into the host cell (5, 6).

80 Recent analyses of existing single-cell sequencing datasets showed that the SARS-CoV2  
81 receptor, *ACE2* is expressed in various cell types of organs of the respiratory tract, with  
82 relatively high expression in goblet cells and ciliated cells of nasal epithelium and club cells in  
83 the lung (7). In addition to respiratory tract, additional single cell sequencing analyses of  
84 cornea, ileum, colon, heart, and gallbladder besides the respiratory tract identified cells that  
85 are susceptible to SARS-CoV2 infection (7). These findings may explain cardiovascular  
86 inflammation, conjunctivitis and diarrhea as well as other symptoms among individuals  
87 infected with SARS-CoV2.

88 One of the major clinical concerns is the effect of SARS-CoV2 on pregnancy and fertility.  
89 Reports with data from a limited number of pregnant women suggest that SARS-CoV2 is  
90 responsible for miscarriages, preterm birth, stillbirth, and fetal growth restrictions due to  
91 placental abnormalities (8, 9). However, the susceptibility of female reproductive organs to  
92 SARS-CoV2 is poorly understood.

93 We investigated the cell-specific presence of *ACE2/TMPRSS2* receptor expression in the  
94 female reproductive organs as a surrogate for their susceptibility to SARS-CoV2. We  
95 examined the myometrium, uterus, ovary, fallopian tube, and breast single-cell RNA  
96 sequencing datasets for cell specific expression of the SARS-CoV2 receptor, *ACE2*. Our study  
97 gave us critical insights into the expression of SARS-CoV2 receptor and proteases *TMPRSS2*,  
98 *CTSB/L* in the female reproductive tract. Our findings suggest that ovary, fallopian tube,  
99 uterus, myometrium, and breast are unlikely to be direct targets for SARS-CoV2 entry.

100

## 101 **METHODS**

### 102 **Datasets and analyses**

103 The published datasets can be found at: fallopian tube (GSE139079), breast (NCBI  
104 GSE113197), ovary (<https://www.ebi.ac.uk/arrayexpress/experiments/E-MTAB-8381/>), and  
105 uterus (GSE134355). We retained the cell clustering the same as described in the respective  
106 manuscripts except for the uterus. For the uterus dataset, we filtered out cells expressing more  
107 than 20% mitochondrial genes and used the standard Seurat pipeline to obtain the cell  
108 clusters.

### 109 **Myometrium tissue collection and preparation of the single-cell suspension**

110 Normal myometrium was collected from the patients undergoing hysterectomy with informed  
111 consent. Tissues were collected under the UCSF Biospecimen Resources (BIOS) program  
112 approved by the institutional review board, ethics approval, 17-22669.

113 Fresh tissue samples were collected, stored in ice-cold HBSS, and transported to the lab. The  
114 myometrium was cut into 3-4 mm pieces. These pieces were then added to the 3-4 ml of  
115 digestion media containing 0.1 mg/ml liberase (Roche, 501003280), 100 U/ml DNase I  
116 (Sigma, D4527), and 25 U/ml dispase (Sigma, D4818) in DMEM (Life Technologies,  
117 12634010) per gm of the tissue, and mechanically dissociated using the gentle MACS  
118 dissociator (Miltenyi Biotech) for 30 mins at 37°C to prepare the single-cell suspension. The  
119 cell suspension was then pipetted up and down with 25 ml, 10 ml, and 5 ml pipette for 1 minute  
120 each and then filtered through 70 µm filter (Corning, 431751). Debris was then removed from  
121 the cell suspension using the debris removal solution (Miltenyi Biotech, 130-109-398) as per  
122 the manufacturer's instructions. The cells were then incubated with RBC lysis buffer  
123 (Thermofisher Scientific, 00-4333-57) for 5 mins on ice to remove the red blood cells. The  
124 cells were then resuspended in the 0.4% ultrapure BSA (Thermofisher Scientific, AM2616) in  
125 PBS and passed through the 70-µm cell strainer (Bel-Art, H13680-0070) to obtain the single-  
126 cell suspension.

### 127 **Single-cell RNA sequencing library preparation**

128 Single cells were processed through 10X Chromium system (10X Genomics, USA) using the  
129 single-cell 5' library and the gel bead kit (10X Genomics, PN-1000006), and the Chromium

130 single cell chip kit (10X Genomics, PN-1000151) as per the manufacturer's instructions. The  
131 cells were partitioned into barcoded gel bead-in-emulsions reverse transcription was  
132 performed on individual droplets. cDNA libraries were then sequenced using an Illumina Hi-  
133 Seq 2500/NOVA (Illumina).

#### 134 **Single-cell RNA-seq data preprocessing and analysis for myometrium dataset**

135 FASTQ files were analyzed using Cellranger (version 3.1; 10x Genomics). Raw count cell by  
136 transcript matrices were imported into R and Seurat (version 3.0) and used for further analysis.  
137 For quality control, cells having fewer than 200 reads, greater than 2500 reads, or more than  
138 seven percent mitochondrial gene expression were removed. The "sctransform" function was  
139 utilized to integrate the Seurat object from the eight tissue samples. Any cells with more than  
140 one percent expression of hemoglobin genes *HBA2*, *HBA1*, and *HBB* were removed. The raw  
141 transcripts were normalized in each cell to transcripts per 10,000 UMI to remove the batch  
142 effects and log2 transformed. The uniform manifold approximation and projection (UMAP) was  
143 used for dimensionality reduction and clustering the cells.

144

## 145 **RESULTS**

### 146 **Expression of *ACE2* or *TMPRSS2* in the ovary**

147 Normal ovarian function is essential for proper oogenesis and fertility. We investigated the  
148 presence of the *ACE2*, *TMPRSS2*, *CTSB*, and *CTSL* in the human ovary cell types derived  
149 from single-cell sequencing (10). Data processing and cluster annotation were performed as  
150 previously described (10) (Fig. 1A, B). We found that *ACE2* was expressed at a very low level  
151 in less than 5% of stroma and perivascular cells of the ovarian cortex. We did not observe the  
152 expression of *TMPRSS2* in any of the eight distinct cell types in the ovary (Fig. 1C, D). *CTSB*  
153 and *CTSL* were found to be expressed in all eight ovarian cell types (Fig. 1C, D). However,  
154 we did not observe any cells in the ovary co-expressing *ACE2/CTSB* or *ACE2/CTSL* (Fig.  
155 1D). Since *ACE2* requires the co-expression of protease *TMPRSS2* or *CTSB/L* to facilitate its

156 entry into the host cell by priming the S protein on its surface, our data suggest that SARS-  
157 CoV2 is unlikely to infect the ovarian cells and unlikely to affect oogenesis.

158

### 159 **Expression of *ACE2* and proteases *TMPRSS2*, *CTSB/L* in the fallopian tube**

160 The fallopian tube is responsible for transporting the oocyte or fertilized egg to the uterus for  
161 implantation. Inflammation and blockage of the fallopian tube can lead to infertility in women.

162 We therefore analyzed SARS-CoV2 receptors expression in different cell types of the fallopian  
163 tube. We analyzed the previously published single-cell dataset from the normal fallopian tube

164 (11). We performed the cluster annotation and filtering of the low-quality cells exactly as  
165 previously described (11). Cell clusters and cluster annotations are shown in Fig. 2A, B. Our

166 analysis of the fallopian tube dataset revealed *ACE2* expression in less than 5% ciliated cells,  
167 secretory cells, and leukocytes. In contrast, proteases *TMPRSS2* and *CTSL/B* showed varying

168 expression levels in all cell types of oviduct. We did not detect expression of *CTSL* in any cell  
169 type of fallopian tube (Fig. 2C, D). We did not observe any fallopian tube cells co-expressing

170 *ACE2* with either of *TMPRSS2* or *CTSB*. We know that the ciliated cells in the fallopian tube  
171 are essential for the movement of oocyte and sperm through the lumen, while secretory cells

172 secrete nutrient-rich fluid for the egg and sperm to find each other (12-14). Together, this data  
173 suggests that SARS-CoV2 infection is unlikely to affect early fertilization events.

174

### 175 **Myometrium expression of SARS-CoV2 receptors**

176 We performed single-cell transcriptome analysis of the normal myometrium collected from the  
177 women undergoing hysterectomy. Seurat analysis of 11,235 high-quality cells from the

178 myometrium revealed the presence of 13 distinct cell populations (Fig. 3A). The  
179 subpopulations included known cell types: smooth muscle cells, fibroblasts, natural killer (NK)

180 cells, T cells, myeloid cells, and endothelial cells (Fig. 3B). These 13 subpopulations were  
181 annotated by performing the differential gene expression analysis supported by the known

182 markers such as *ACTA2*, *CNN1* for smooth muscle, *VWF* and *PECAM* for endothelial cells,

183 *DCN* and *LUM* for fibroblasts, *CD3D* for T cells, *GNLY* and *NKG7* for NK cells, *PROX1* for  
184 lymphatic endothelial cells and *CD14*, and *S100A8* for myeloid cells (S.Fig. 1). We observed  
185 low expression of *ACE2* in approximately 1% of the fibroblast cells in the myometrium. We did  
186 not observe expression of *TMPRSS2* in any of the cell types in normal myometrium (Fig.  
187 3C,D). We also investigated the presence of cathepsins in these cell types. It has been  
188 previously reported that *CTSB* and *CTSL* are potentially involved in facilitating the entry of the  
189 SARS-CoV2 into the cell in the absence of *TMPRSS2* (5). We discovered that myeloid cells,  
190 endothelial cells, lymphatic endothelial cells, T-cells, NK cells, and fibroblast cell populations  
191 in the myometrium express *CTSB* and *CTSL* (Fig. 3C, D). Interestingly, we did not find co-  
192 expression of either *CTSB* or *CTSL* with *ACE2* (Fig. 3D). These findings indicate that SARS-  
193 CoV2 is unlikely to infect the smooth muscle cells in the myometrium, suggesting that COVID-  
194 19 infection is unlikely to cause myometrial inflammation and potentially preterm birth.

195

#### 196 **Cell-specific expression of SARS-CoV2 receptors in uterus**

197 Once the egg is fertilized, the uterus plays a critical role in the implantation and maintenance  
198 of pregnancy. Our data in the myometrium did not indicate co-expression for genes necessary  
199 for SARS-CoV2 infection. To determine if SARS-CoV2 might affect the uterine function, we  
200 wanted to investigate the expression of SARS-CoV2 receptor in the whole uterus. Therefore,  
201 we investigated the co-expression of *ACE2* with *TMPRSS2* and *CTSB/L* from single-cell  
202 sequencing of the whole uterus (15). Analysis of uterine dataset revealed presence of 10  
203 clusters including smooth muscle cells, stromal cells, luminal epithelium, endothelial cells,  
204 fibroblasts, and macrophages (Fig. 4A, B). Expression analysis of *TMRSS2* revealed the  
205 absence of *TMPRSS2* RNA in all cell types of the uterus. We found very low expression of  
206 *ACE2* in approximately 5% of the stromal cells and 1% endothelial cells (Fig. 4C, D). We also  
207 assessed the expression of *CTSB/L* in the uterus dataset and found that both *CTSB/L* are  
208 expressed in all cell types of the uterus (Fig. 4C, D). However, none of these cell types co-

209 expressed *ACE2* with either *CTSL* or *CTSB* (Fig. 4D). These findings suggest that it is unlikely  
210 that uterus is susceptible to SARS-CoV2 infection in humans.

211

### 212 **Cell-specific expression of *ACE2* and *TMPRSS2* in breast epithelium**

213 We also wanted to investigate if the SARS-CoV2 can infect the mammary gland epithelium  
214 cells and potentially be transmitted to the neonates through the breast milk. We investigated  
215 the presence of *ACE2*, *TMPRSS2*, and *CTSBL/B* within the single-cell sequencing dataset  
216 from the primary human breast epithelial cells (16). These samples were collected from  
217 patients undergoing reduction mammoplasties. UMAP) and cell cluster annotations are shown  
218 in Fig 5A and B. We found that *ACE2* was expressed in approximately 5% of luminal  
219 epithelium and myofibroblasts in breast epithelium (Fig. 5C, D). *TMPRSS2* was expressed at  
220 very low levels in the luminal epithelium, basal and myofibroblast cells (Fig. 5C, D). Both *CTSB*  
221 and *CTSL* were expressed all cell types of the breast epithelium (Fig. 5C, D). However, we  
222 did not find any cells in the breast epithelium co-expressing *ACE2* and either of the proteases  
223 (Fig. 5D). As the co-expression of *ACE2/TMPRSS2* or *ACE2/CTSB/L* is important for the  
224 entry of the virus into the cell, these findings indicate that there is no risk of vertical  
225 transmission of SARS-CoV2 in neonates through breastfeeding by infected mother as breast  
226 is unlikely to be infected by SARS-CoV2.

227

### 228 **DISCUSSION**

229 With the SARS-CoV2 infection affecting multiple organs, there are increasing concerns about  
230 the effect of SARS-CoV2 on pregnancy and fertility (17). There is very limited and conflicting  
231 data on how COVID-19 affects pregnancy and transmission of SARS-CoV2 from mother to  
232 the neonate (9). In this study, we analyzed single-cell sequencing datasets from uterus, ovary,  
233 fallopian tube, and breast to better understand the susceptibility of different cell types in the  
234 female reproductive tract to infection by SARS-CoV2.



235 Studies with limited patient numbers have shown that the women infected with SARS-CoV2  
236 have a higher incidence of premature delivery, miscarriage, and intrauterine growth restriction  
237 (9). Total reports from 32 patients have suggested that 47% of women affected by COVID-19  
238 had preterm deliveries (9). However, the aforementioned studies are small and there is no  
239 convincing evidence on whether the preterm births were directly due to SARS-CoV2 infection  
240 of the reproductive tract, secondary effects of systemic inflammation, or mechanisms  
241 unrelated to SARS-CoV2. Our data in this study revealed very low expression of *ACE2* in  
242 uterine stromal cells and endothelial cells. We did not detect expression of *TMPRSS2* in any  
243 of the uterine cell. However, *CTSB* and *CTSL* were expressed in the fibroblasts, stroma,  
244 smooth muscle cells and macrophages of the uterus. SARS-CoV2 uses *CTSB/L* proteases  
245 that act as an alternative pathway to enter the host cell in the absence of *TMPRSS2* (5). Since  
246 we did not find co-expression of *ACE2* with any of the proteases implicated in the entry of the  
247 SARS-CoV2, it seems unlikely that uterus will be affected by COVID-19. The myometrium,  
248 which regulates uterine contractions and is critical in the onset of labor, did not contain cells  
249 that co-expressed *ACE2/TMPRSS2* receptors. Together, these results indicate that COVID-  
250 19 infection is unlikely to infect myometrial cells directly. SARS-CoV2 is therefore unlikely to  
251 directly contribute to abnormal uterine function which may result in implantation failure,  
252 preterm birth, and early placentation.

253 We found that while *ACE2* was expressed in approximately 1% of stromal cells and  
254 perivascular cells, *TMPRSS2* was not expressed in any of the eight ovarian cell types.  
255 Furthermore, fallopian tube data showed very few ciliated cells, secretory cells, and leukocytes  
256 that expressed *ACE2*. We did not find any cells co-expressing *ACE2* and *TMPRSS2* or  
257 *CTSB/L* in either ovary or fallopian tube. Together these results suggest that SARS-CoV2 is  
258 unlikely to affect female fertility. A recent study analyzing the previously published testes  
259 single-cell sequencing dataset identified *ACE2* in spermatogonia stem cells, Leydig cells, and  
260 mast cells. However, these cells lacked co-expression of the *TMPRSS2* receptor(7). These

261 findings together with our study suggest that the SARS-CoV2 infection is unlikely to damage  
262 fertility.

263 Recent studies using the already published placental single-cell sequencing datasets have  
264 shown that syncytiotrophoblast cells, villous cytotrophoblast cells, decidual perivascular cells,  
265 decidual stromal cells in placenta express *ACE2* in 6-14 weeks of gestation. However, these  
266 investigators did not observe co-expression of *ACE2* and *TMPRSS2* in any of the placental  
267 cells at this stage (7). Interestingly, another independent study found expression of *TMPRSS2*  
268 only in villous cytotrophoblast and epithelial glandular cells and syncytiotrophoblast cells,  
269 using the same dataset (Li et al. 2020). However, they also found that very few cells co-  
270 expressed both *ACE2* and *TMPRSS2* only in villous cytotrophoblast cells. They did not  
271 observe the co-expression of *TMPRSS2* and *ACE2* in any other cell types of the placenta (Li  
272 et al. 2020). In this study, the authors also compared the SARS-CoV2 receptors at different  
273 stages of placental growth and found the SARS-CoV2 receptor expression is dynamic with  
274 the placental growth, with significant increase in the expression of both *ACE2* and *TMPRSS2*  
275 in the extravillous trophoblasts at 24 weeks of gestational age compared to the early stages.  
276 The increase in the expression of the SARS-CoV2 receptor at later stages of placental  
277 development might explain the reports of the placental abnormalities leading to miscarriages  
278 or fetal growth restriction in women infected with COVID-19 (8, 18). However, further detailed  
279 investigations with large sample sizes are warranted to draw any substantial conclusions.

280 We also wanted to find out if breast cells are susceptible to the COVID-19 infection.  
281 Current obstetric protocols for infected mothers in labor, call for temporary separation of  
282 mother and baby to prevent SARS-CoV2 transmission. Our analysis of the mammary gland  
283 dataset revealed a low expression of *ACE2* in luminal epithelium and myofibroblasts cell types.  
284 However, we did not find co-expression of *ACE2* with *TMPRSS2* or *CTSB/L* in any cell types  
285 in the breast epithelium. These findings suggest that the virus might not be able to penetrate  
286 the mammary gland cells. Therefore, the chances of transmission of the virus through  
287 breastfeeding are negligible.

288 Together, these results suggest that major reproductive organs involved in female  
289 fertility and pregnancy are not susceptible to direct SARS-CoV2 infection. These data may  
290 explain low incidence of complications among pregnant women and little evidence for higher  
291 infertility (17). Our analyses is limited by the current single cell sequencing data sets and  
292 somewhat limited number of cell population in each individual organ. Moreover, SARS-CoV2  
293 systemic infection is known to affect vasculature (19) as well as increase the risk of thrombosis  
294 (20) and these abnormalities may be significantly more detrimental factors to fertility and  
295 pregnancy than direct infection on the reproductive organs. Prospective studies on couples  
296 that conceive are necessary to better define the true effect of SARS-CoV2 infection on fertility  
297 and adverse pregnancy outcomes.

298

#### 299 **CODE AVAILABILITY**

300 [https://github.com/joshucsf/cell\\_specific\\_ace2\\_in\\_female\\_repro](https://github.com/joshucsf/cell_specific_ace2_in_female_repro)

301

#### 302 **AUTHOR'S ROLES**

303 JG and AR designed the study, JG and JR performed the data analysis; JG and AR wrote the  
304 manuscript. AR supervised the study and provided financial support. All authors reviewed,  
305 commented and approved the manuscript

306

#### 307 **ACKNOWLEDGEMENTS**

308 We thank all the authors who provided the online-available single cell sequencing data used  
309 in this study. This work was supported by funding from National Institute of Child Health and  
310 Human Development (5P50HD098580).

311

#### 312 **CONFLICT OF INTEREST**

313 Authors declare no conflict of interest.

314

315 **REFERENCES**

- 316 1. Fung TS, Liu DX. Human Coronavirus: Host-Pathogen Interaction. *Annu Rev Microbiol*  
317 2019;73:529-57.
- 318 2. Chen N, Zhou M, Dong X, Qu J, Gong F, Han Y *et al.* Epidemiological and clinical  
319 characteristics of 99 cases of 2019 novel coronavirus pneumonia in Wuhan, China: a  
320 descriptive study. *Lancet* 2020;395:507-13.
- 321 3. . Situation report -107. In: World health organization, 2020.
- 322 4. . In: Centers for Disease Control and Prevention 2020.
- 323 5. Hoffmann M, Kleine-Weber H, Schroeder S, Kruger N, Herrler T, Erichsen S *et al.* SARS-  
324 CoV-2 Cell Entry Depends on ACE2 and TMPRSS2 and Is Blocked by a Clinically Proven Protease  
325 Inhibitor. *Cell* 2020;181:271-80 e8.
- 326 6. Iwata-Yoshikawa N, Okamura T, Shimizu Y, Hasegawa H, Takeda M, Nagata N.  
327 TMPRSS2 Contributes to Virus Spread and Immunopathology in the Airways of Murine Models  
328 after Coronavirus Infection. *J Virol* 2019;93.
- 329 7. Sungnak W, Huang N, Becavin C, Berg M, Queen R, Litvinukova M *et al.* SARS-CoV-2  
330 entry factors are highly expressed in nasal epithelial cells together with innate immune genes.  
331 *Nat Med* 2020;26:681-7.
- 332 8. Shanes ED, Mithal LB, Otero S, Azad HA, Miller ES, Goldstein JA. Placental pathology  
333 in COVID-19. *medRxiv* 2020:2020.05.08.20093229.
- 334 9. Mullins E, Evans D, Viner RM, O'Brien P, Morris E. Coronavirus in pregnancy and  
335 delivery: rapid review. *Ultrasound Obstet Gynecol* 2020;55:586-92.
- 336 10. Wagner M, Yoshihara M, Douagi I, Damdimopoulos A, Panula S, Petropoulos S *et al.*  
337 Single-cell analysis of human ovarian cortex identifies distinct cell populations but no oogonial  
338 stem cells. *Nat Commun* 2020;11:1147.
- 339 11. Hu Z, Artibani M, Alsaadi A, Wietek N, Morotti M, Shi T *et al.* The Repertoire of Serous  
340 Ovarian Cancer Non-genetic Heterogeneity Revealed by Single-Cell Sequencing of Normal  
341 Fallopian Tube Epithelial Cells. *Cancer Cell* 2020;37:226-42 e7.
- 342 12. Paik DY, Janzen DM, Schafenacker AM, Velasco VS, Shung MS, Cheng D *et al.* Stem-like  
343 epithelial cells are concentrated in the distal end of the fallopian tube: a site for injury and  
344 serous cancer initiation. *Stem Cells* 2012;30:2487-97.
- 345 13. Afzelius BA, Camner P, Eliasson R, Mossberg B. Kartagener's syndrome does exist.  
346 *Lancet* 1978;2:950.
- 347 14. Leese HJ, Tay JI, Reischl J, Downing SJ. Formation of Fallopian tubal fluid: role of a  
348 neglected epithelium. *Reproduction* 2001;121:339-46.
- 349 15. Han X, Zhou Z, Fei L, Sun H, Wang R, Chen Y *et al.* Construction of a human cell  
350 landscape at single-cell level. *Nature* 2020;581:303-9.
- 351 16. Nguyen QH, Pervolarakis N, Blake K, Ma D, Davis RT, James N *et al.* Profiling human  
352 breast epithelial cells using single cell RNA sequencing identifies cell diversity. *Nat Commun*  
353 2018;9:2028.
- 354 17. Panahi L, Amiri M, Pouy S. Risks of Novel Coronavirus Disease (COVID-19) in  
355 Pregnancy; a Narrative Review. *Arch Acad Emerg Med* 2020;8:e34.
- 356 18. Baud D, Greub G, Favre G, Gengler C, Jatton K, Dubruc E *et al.* Second-Trimester  
357 Miscarriage in a Pregnant Woman With SARS-CoV-2 Infection. *JAMA* 2020.

358 19. Ackermann M, Verleden SE, Kuehnel M, Haverich A, Welte T, Laenger F *et al.*  
 359 Pulmonary Vascular Endothelialitis, Thrombosis, and Angiogenesis in Covid-19. *N Engl J Med*  
 360 2020.

361 20. Connors JM, Levy JH. COVID-19 and its implications for thrombosis and  
 362 anticoagulation. *Blood* 2020;135:2033-40.

363

364

365 **FIGURES**

366

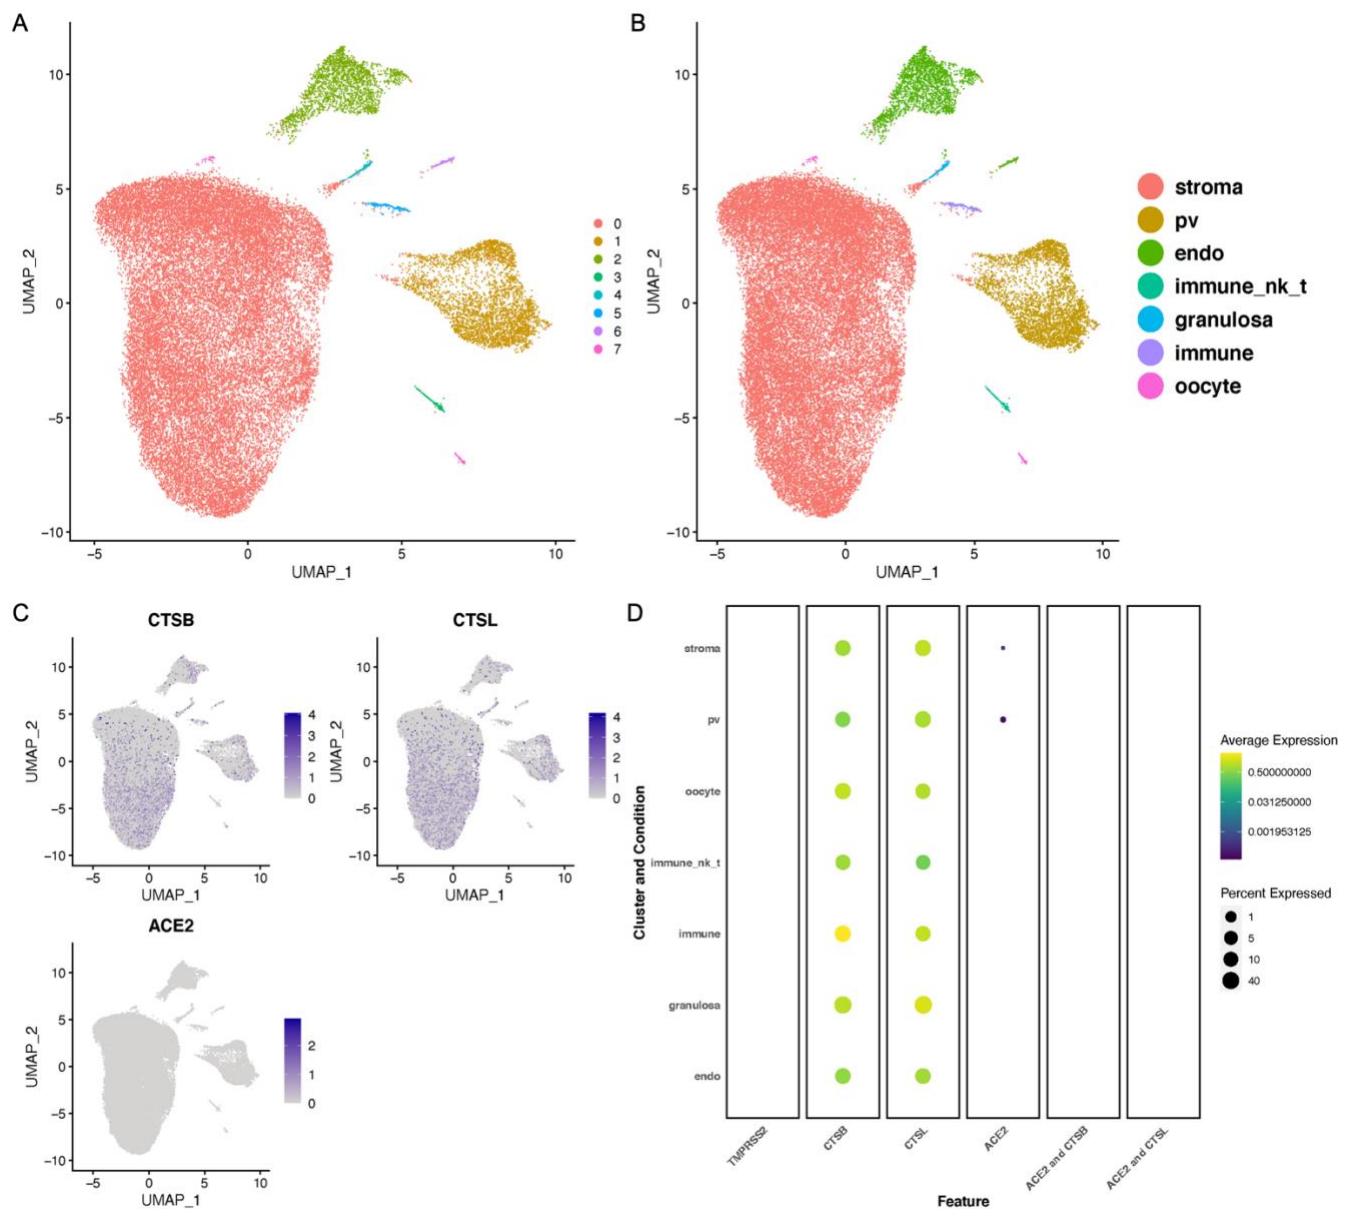

367

368 **Fig1. Expression of *ACE2*, and cathepsins B and L in the human ovary:** A) UMAP  
369 showing the number of different clusters in ovary. B) UMAP projection with the cell annotations  
370 in the human ovarian cortex. Pv, perivascular cells; endo, endothelial cells; immune NK-T,  
371 natural killer cells and T -cells. The raw data was normalized, log transformed and analyzed  
372 same as the described in the published paper (10). C) Feature plots showing the expression  
373 of the *ACE2*, *TMPRSS2*, *CTSB*, and *CTSL* in the ovary UMAP, grey: No RNA expression  
374 purple: RNA positive. D) Dot plots showing the expression of the genes in each cell type along  
375 with the co-expression of *ACE2/CTSB* and *ACE2/CTSL* (with Benjamini Hochberg adjusted p  
376 value). The dot size represents the proportion of the cells within the respective cell type  
377 expressing the gene and the color indicates the average gene expression.

378

379

380

381

382

383

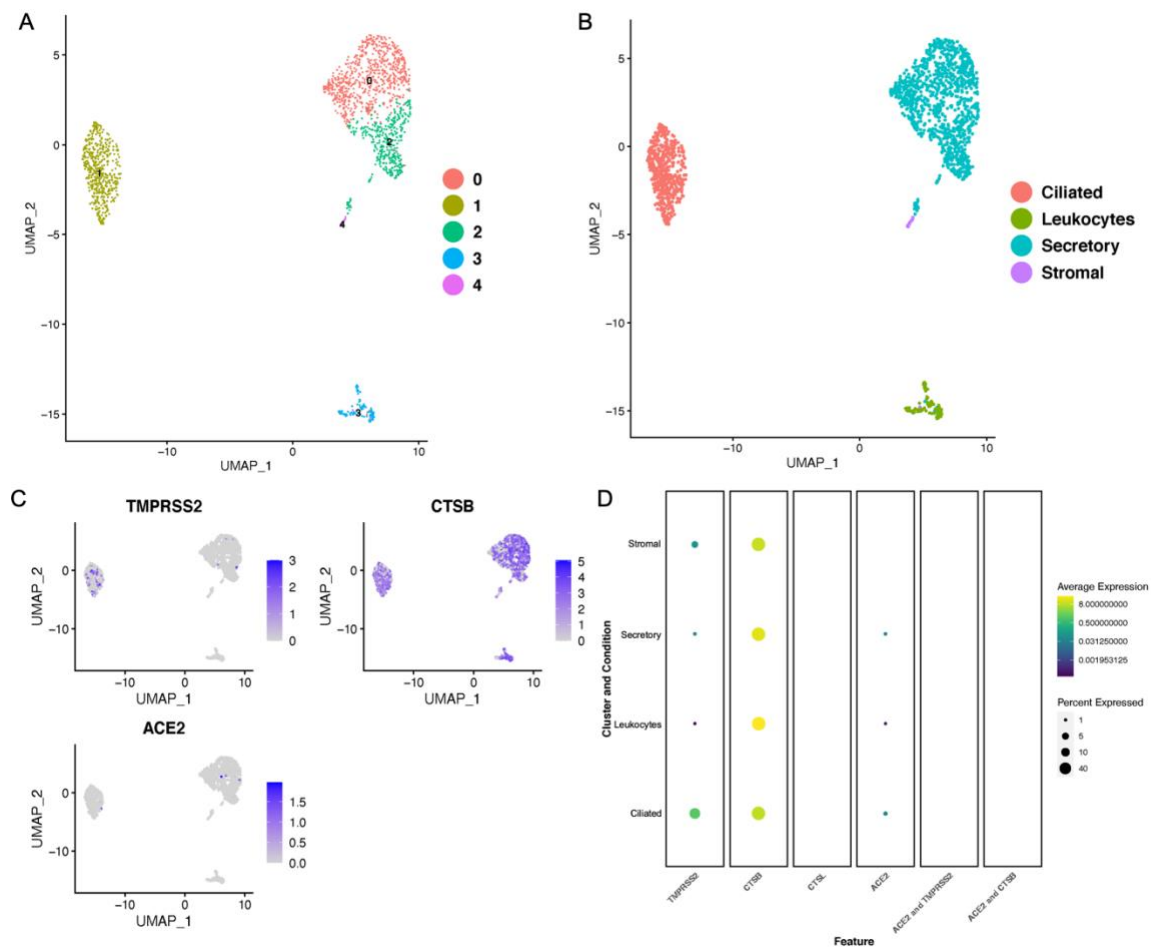

384

385 **Fig2. Expression of ACE2 and proteases TMPRSS2, CTSL in the fallopian tube** A)

386 UMAP projections of the cell clusters in normal fallopian tube B) UMAP showing the cell

387 annotation of the normal fallopian tube. C) Feature plots showing the expression of SARS-

388 CoV2 receptor, ACE2, and proteases TMPRSS2, CTSL and CTSL in the normal fallopian

389 tube grey: No RNA expression purple: RNA positive D) Dot plots showing the expression of

390 the genes in each cell type along with the co-expression of the ACE2/TMPRSS2 and ACE2/

391 CTSL in the normal fallopian tube (with Benjamini–Hochberg-adjusted p values). The dot size

392 represents the proportion of the cells within the respective cell type expressing the gene and

393 the color indicates the average gene expression.



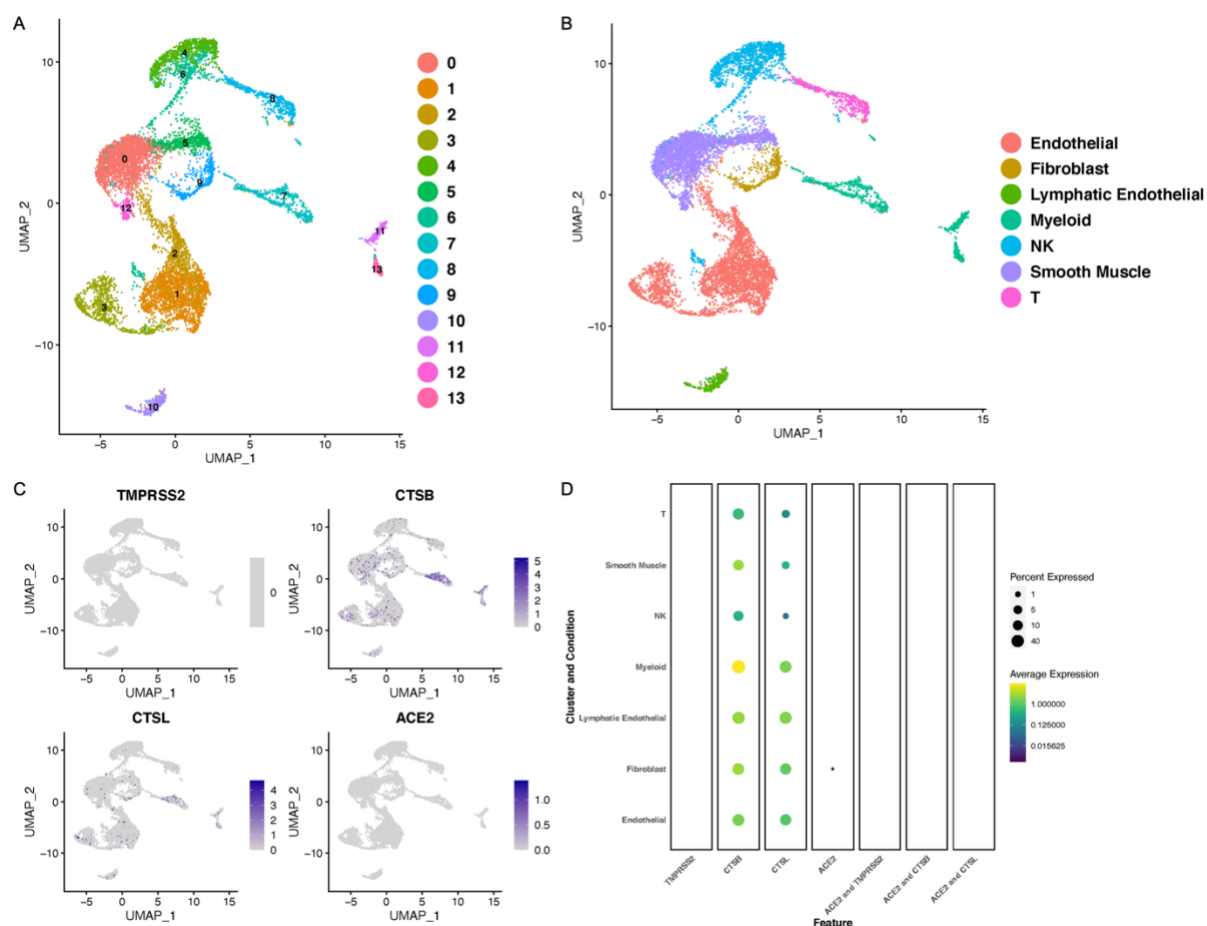

394

395 **Fig3. ACE2 and TMPRSS2 expression in the human normal myometrium:** A) UMAP  
 396 projection of the number of different cell clusters in the normal human myometrium. B) UMAP  
 397 projection with the cell annotations in the normal human myometrium. C) Feature plots  
 398 showing the expression of the *ACE2*, *TMPRSS2*, *CTSB*, and *CTSL* in the myometrium UMAP,  
 399 grey: No RNA expression purple: RNA positive D) Dot plots showing the expression of the  
 400 genes in each cell type (with Benjamini–Hochberg-adjusted p values). The dot size represents  
 401 the proportion of the cells within the respective cell type expressing the gene and the color  
 402 indicates the average gene expression.



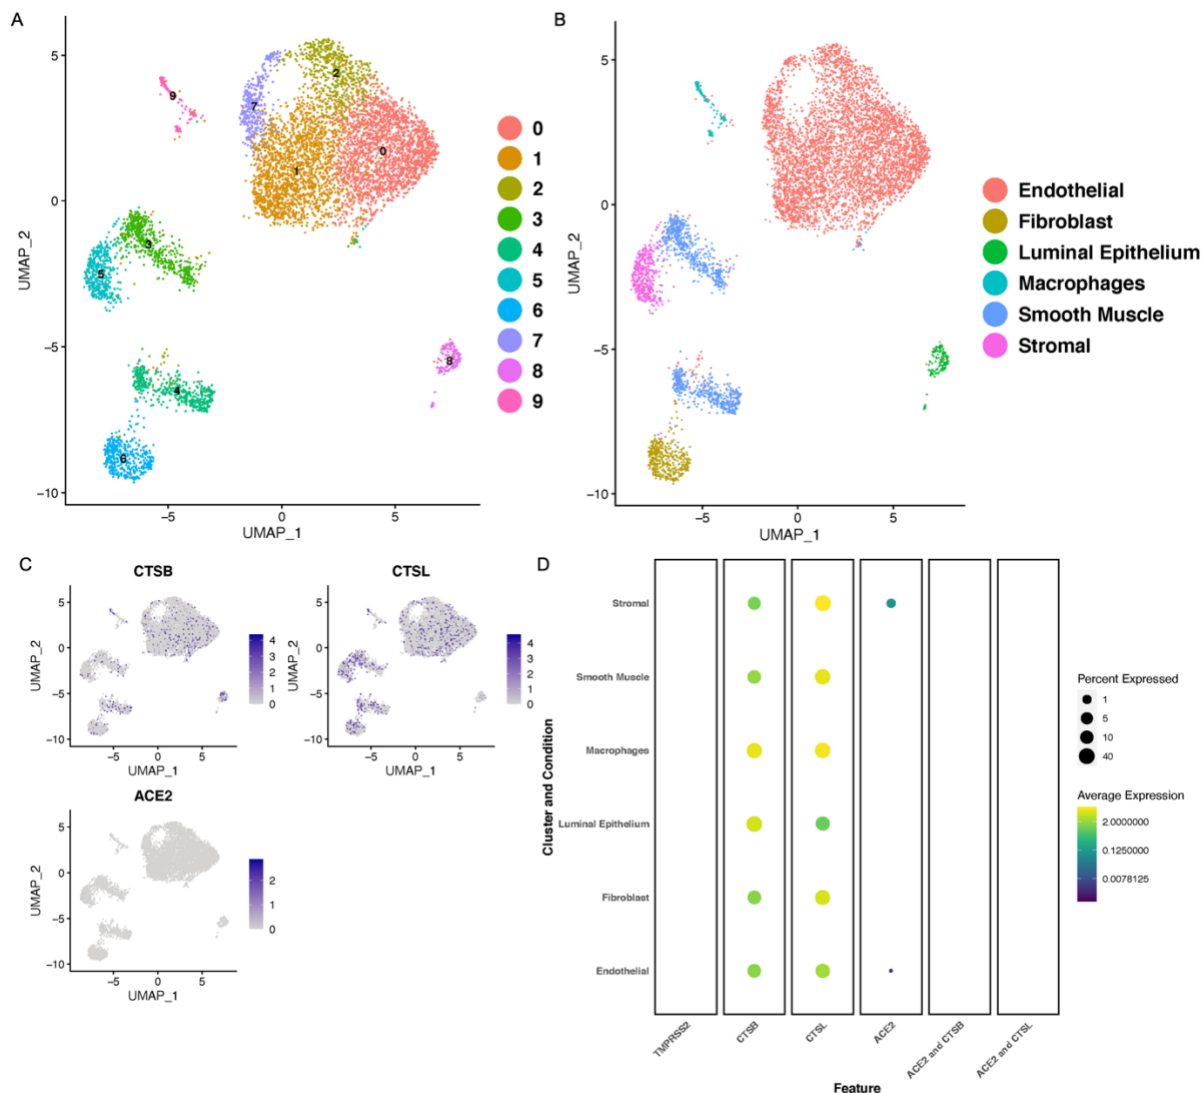

403

404 **Fig4. Cell-specific expression of SARS-CoV2 receptors in human uterus** A) UMAP

405 projections of the cell clusters in normal uterus B) UMAP showing the cell annotation of the

406 human uterus tube. C) Feature plots showing the expression of SARS-CoV2 receptor, ACE2,

407 and proteases *TMPRSS2*, *CTSB* and *CTSL* in the uterus grey: No RNA expression purple:

408 RNA positive D) Dot plots showing the expression of the genes in each cell type along with

409 the co-expression of the *ACE2/TMPRSS2* and *ACE2/CTSB* in the uterus (with Benjamini–

410 Hochberg-adjusted p values). The dot size represents the proportion of the cells within the

411 respective cell type expressing the gene and the color indicates the average gene expression.

412

413

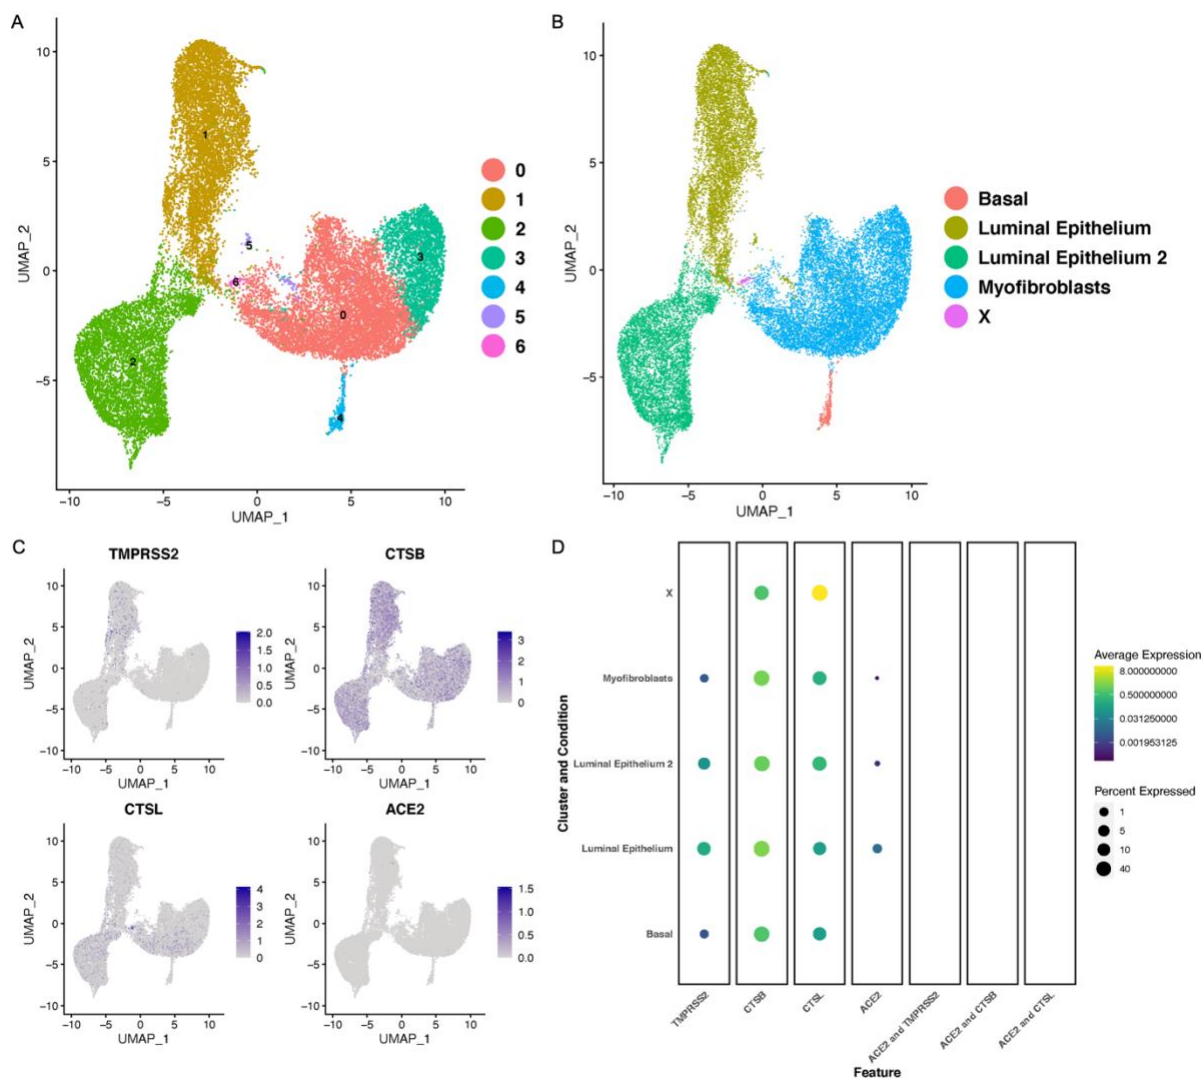

414

415 **Fig5. Expression of COVID receptors in the human breast epithelium:** A) UMAP showing

416 the number of different clusters in breast epithelium. B) UMAP projections with the cell

417 annotations in the human breast epithelium. C) Feature plots showing the expression of ACE2,

418 *TMPRSS2*, *CTSB* and *CTSL* in the breast epithelium. D) Dot plots showing the expression of

419 *ACE2*, *TMPRSS2*, *CTSB*, and *CTSL* along with co-expression of *ACE2/TMPRSS2*,

420 *ACE2/CTSB* and *ACE2/CTSL* in different cell clusters in the breast epithelium. The dot size is

421 indicative of the expression of the genes in the cell type with Benjamini Hochberg adjusted p

422 value). The dot size represents the proportion of the cells within the respective cell type

423 expressing the gene and the color indicates the average gene expression.

424

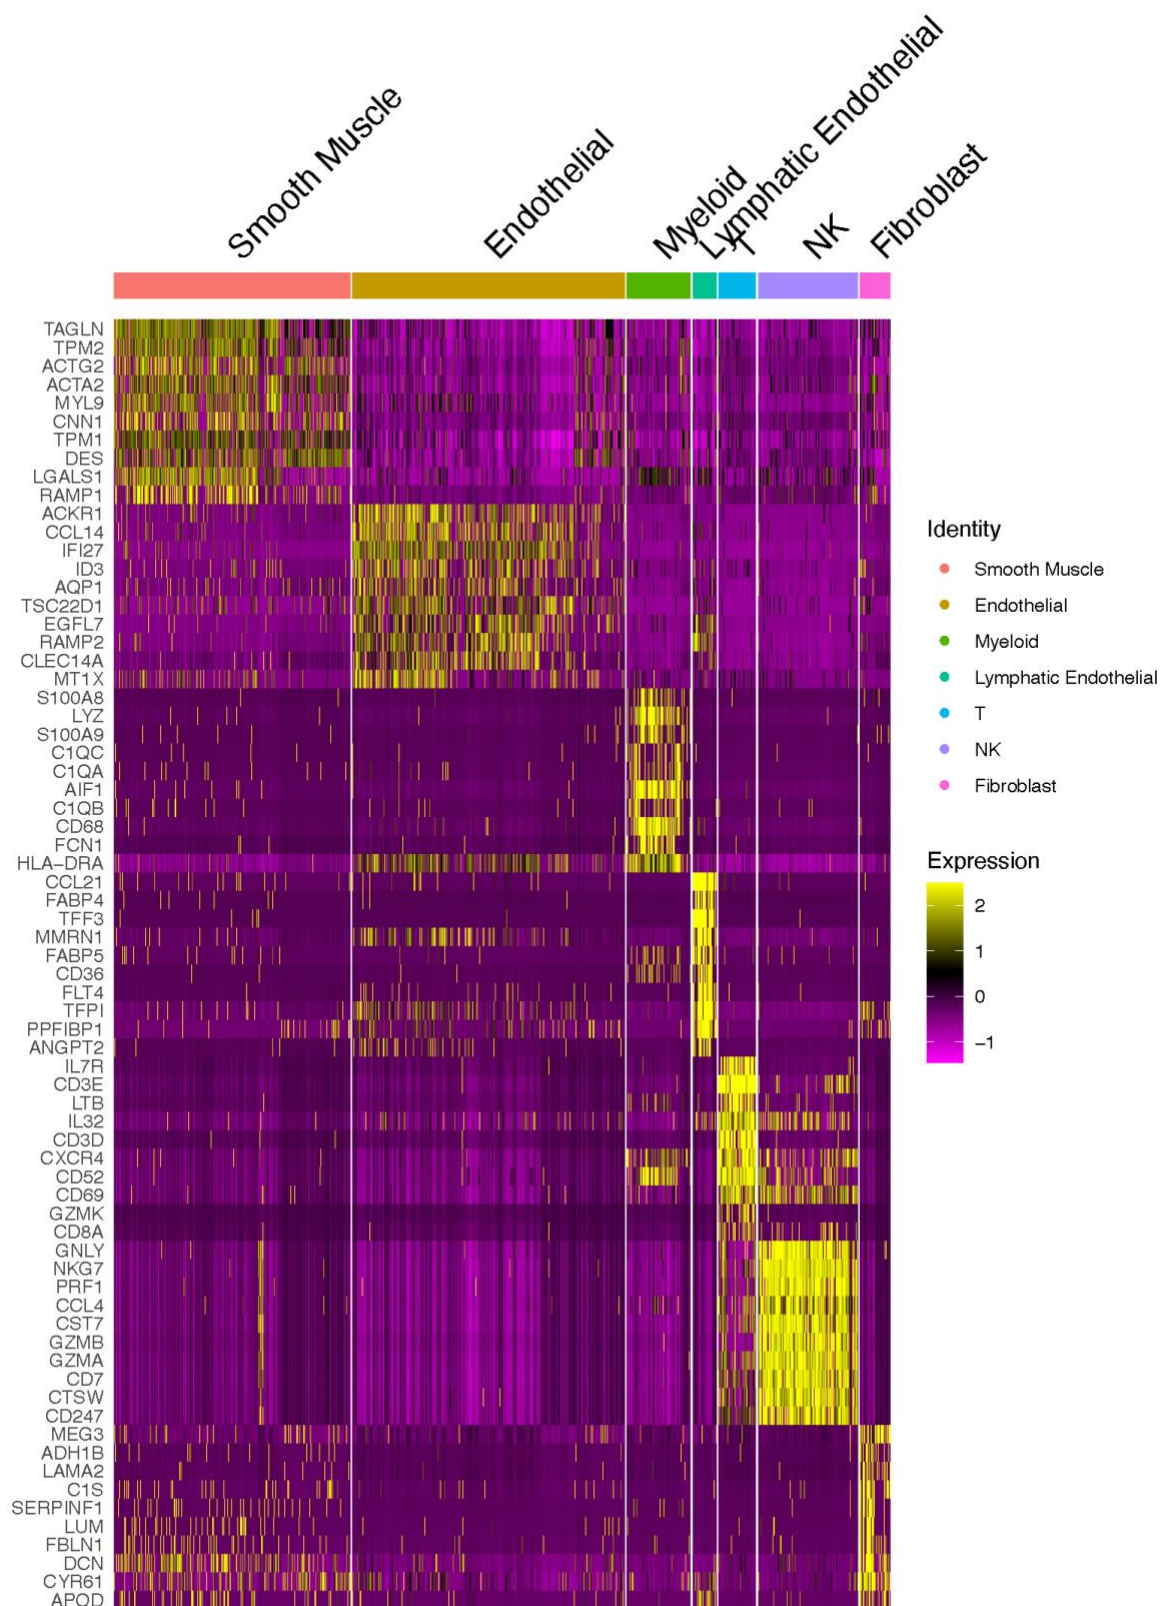

426 **S.Fig1.** Heatmap showing the cluster annotation based on the expression of the top genes in  
427 the cell cluster. Colors represent the expression level as shown in the scale bar.  
428
